# Supplementary material
Source: publisher site journal article supplement (https://www.dovepress.com/article/299595)

## Appendix 2: Subgroup analysis of operative time

## Rest-Mean(Duration of surgery)<160min

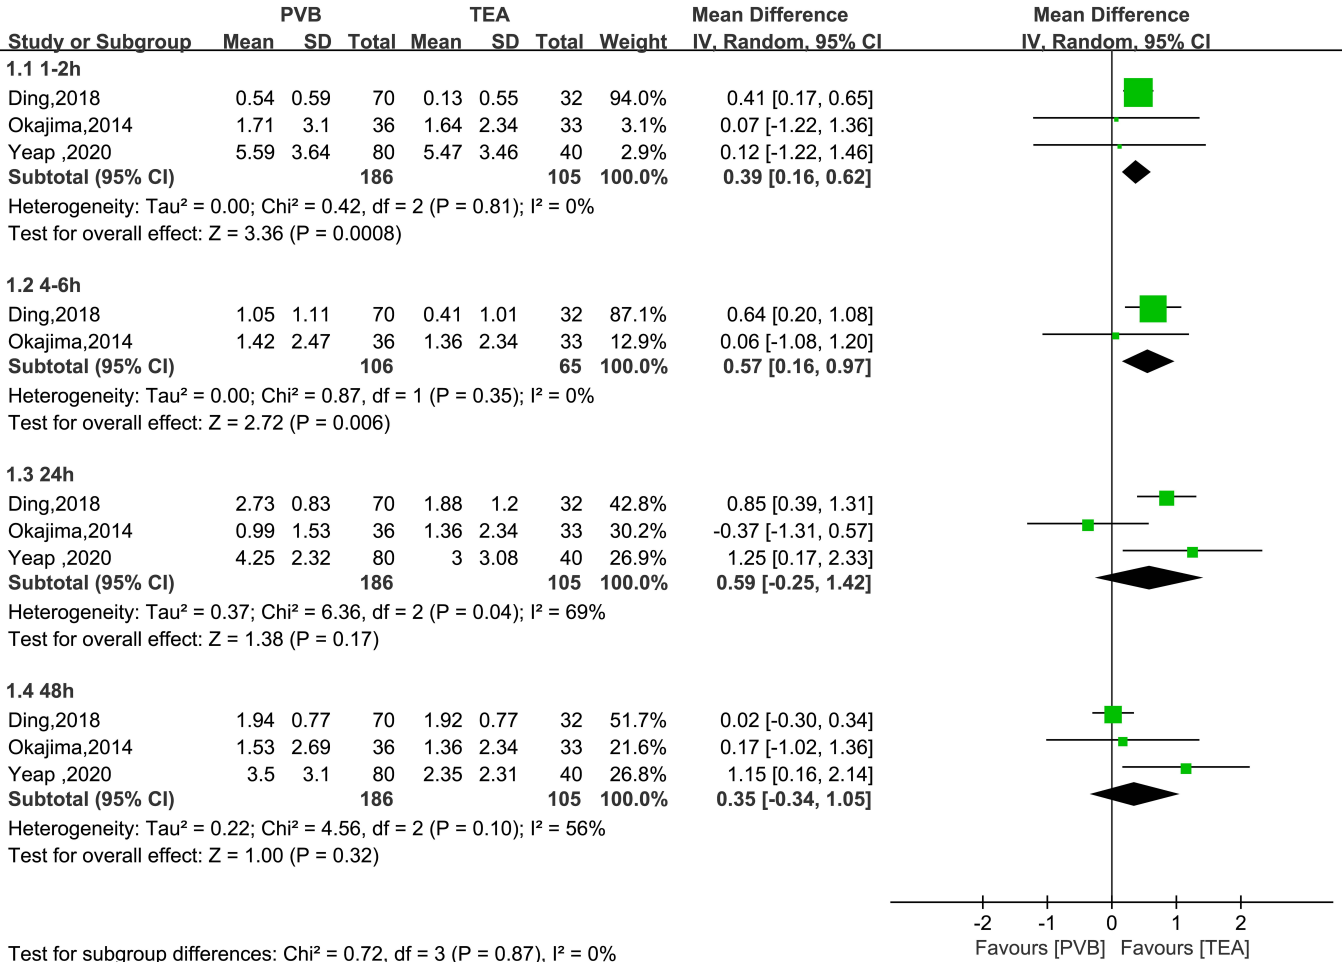

Rest-Mean(Duration of surgery)> 160min

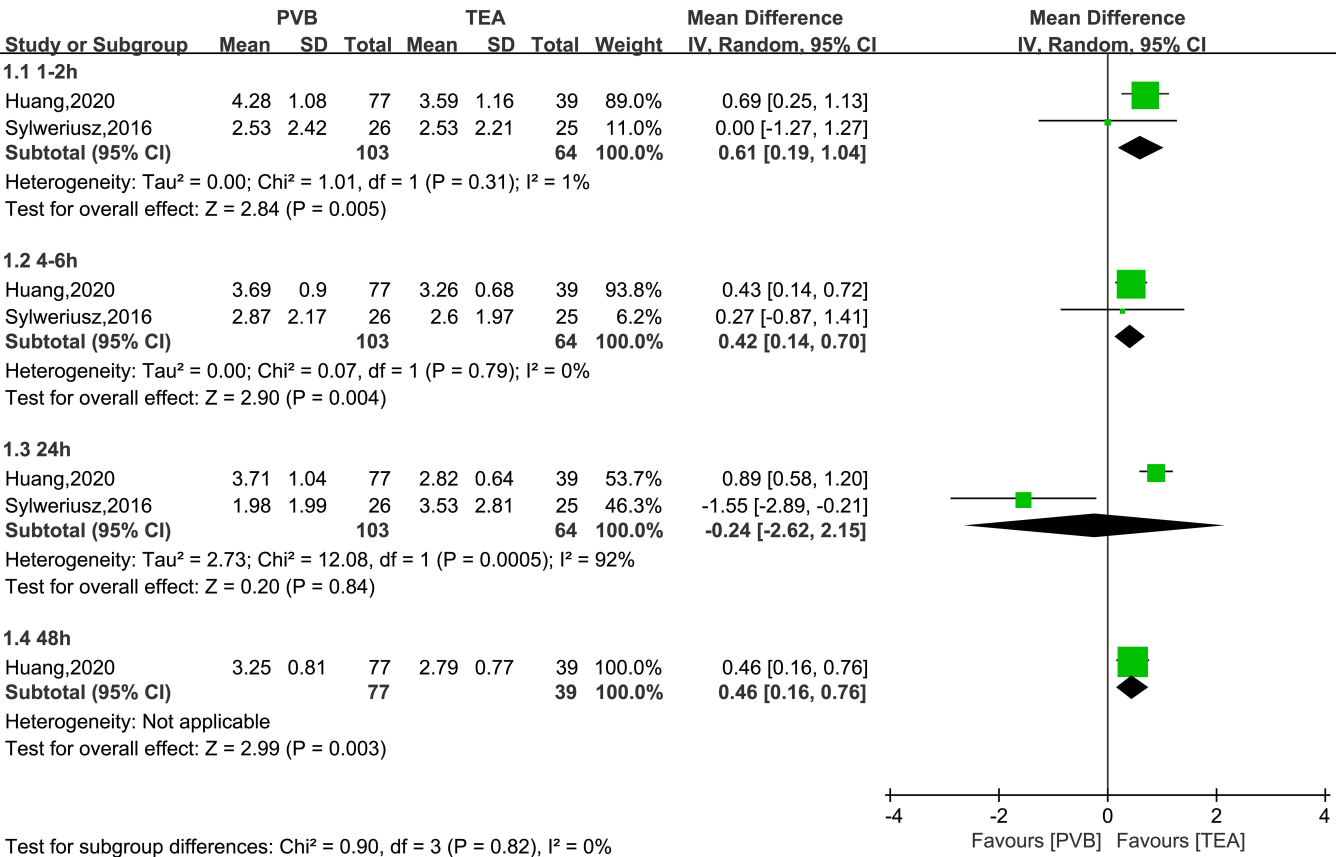

Cough-Mean(Duration of surgery)<160min

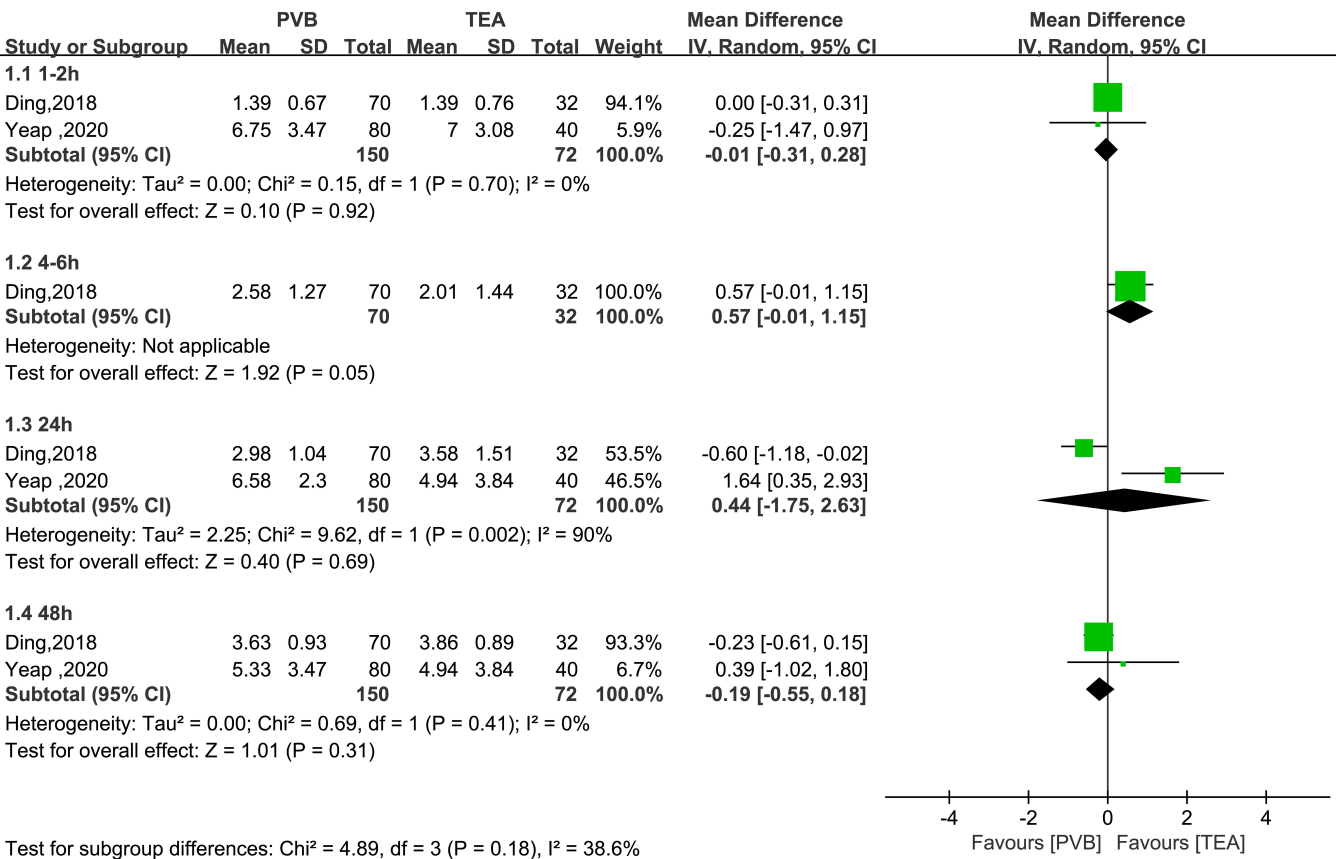

# Cough-Mean(Duration of surgery)>160min

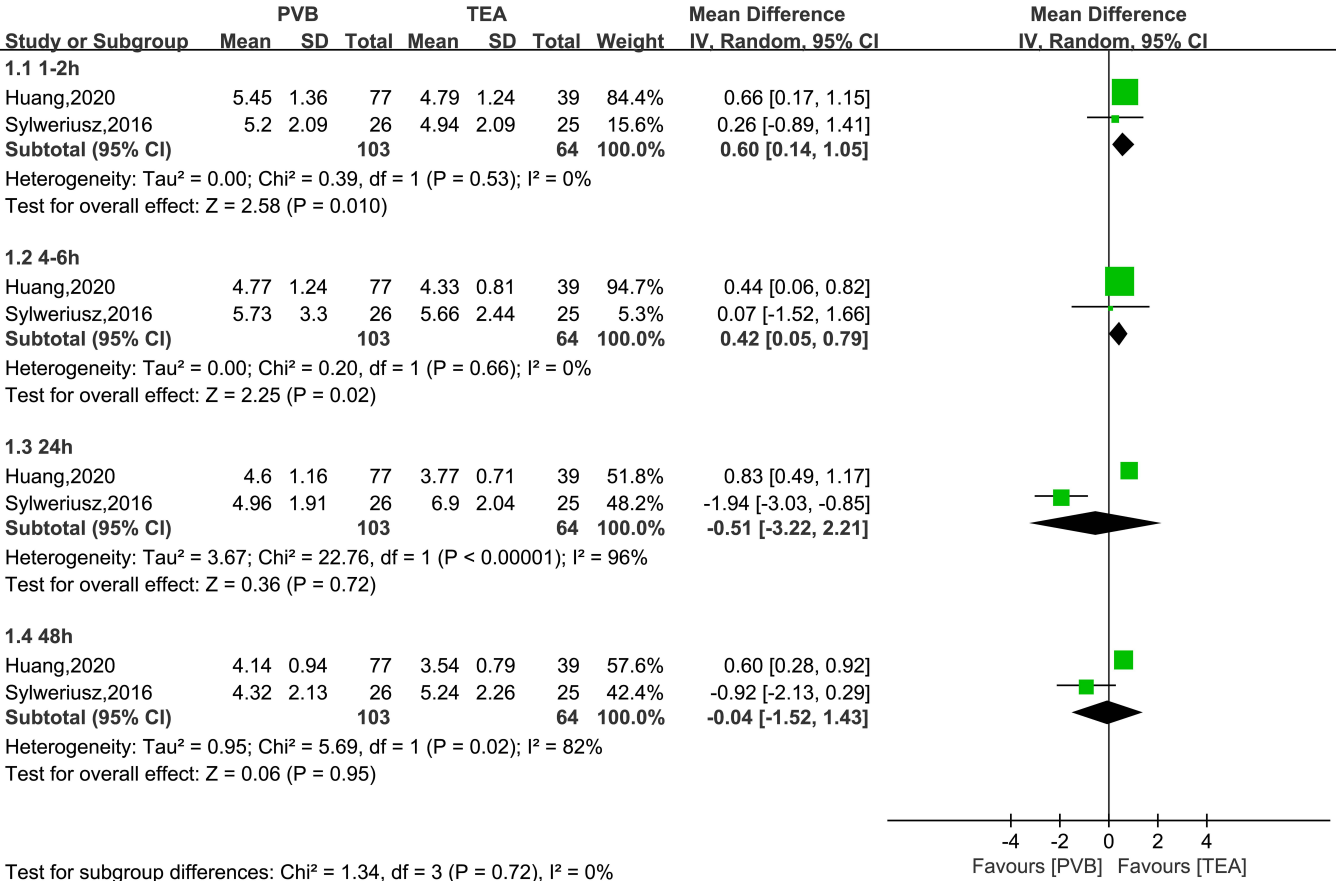

Supplement: Supplementary file 1 [file Appendix-2.pdf › Appendix-2.pdf]
